# Supplementary material for: Middle Eocene Climatic Optimum (MECO) and its imprint in the continental Escanilla Formation, Spain
Source: Copernicus journal article supplement (doi:10.5194/egusphere-2023-894), 2023-05-24
Supplement: Supplementary file 1 [file Clumped_Isotope_Thermometry.xlsx]

## Sheet: Clumped_Temperature
Sample Name	Sample Weight (mg)	Delta(13) wrt PDB	Std Err	Delta(18) wrt PDB	Std Err	Raw d47	Std Err	D 47 raw	Std Err	D 48 raw	Std Err	D 49 raw	Std Err	δ13C VPDB	δ18O VPDB Calcite	δ18O VSMOW Calcite	Yield % (as CaCO3)	Δ47 ETF-Cc	T-1 (Kluge et al., 2015)	Δ47-90 ETF-Cc	T-2 (Bonifacie et al, 2017)	T-3 (Anderson et al, 2021)	Comments
NS1.1	4150	-2.7008	0.001	1.7062	0.002	7.3584	0.009	-0.3656	0.009	-0.2787	0.041	-39.2152	2.47	-2.4742	-7.10635	23.584	74.442	0.641916	44.3131	0.553916	40.9575	39.5327	Stromatolites
NS1.2	4032	-3.0577	0.001	1.8236	0.001	7.3559	0.001	-0.350436	0.00743149	-0.1862	0.034	-21.4528	1.921	-2.81317	-6.88746	23.8096	76.8409	0.644252	43.3762	0.556252	40.1035	38.6237
NS1.3	4060	-2.9068	0.001	1.9078	0.001	7.3585	0.007	-0.368453	0.0064758	-0.221	0.03	-25.9875	1.707	-2.66552	-6.84085	23.8577	74.9671	0.649738	41.2075	0.561738	38.1243	36.5191
NS2.1	4030	-3.8423	0.001	1.8555	0.002	6.4053	0.012	-0.344832	0.00787523	-0.2929	0.03	-39.1614	2.27956	-3.61596	-6.95836	23.7366	75.1881	0.664443	35.6075	0.576443	32.999	31.0816
NS2.2	3925	-3.901	0.001	1.6869	0.001	6.1635	0.008	-0.370553	0.0074293	-0.2309	0.03	-30.5216	1.822	-3.65996	-7.05982	23.632	69.1595	0.644051	43.4562	0.556051	40.1764	38.7013
NS2.3	4019	-3.9247	0.001	1.7193	0.002	6.1114	0.043	-0.363238	0.00686286	-0.1924	0.054	-42.1975	7.764	-3.68366	-7.02771	23.6651	66.8581	0.656349	38.6523	0.568349	35.7883	34.0386
NS3.1	4100	-3.7066	0.001	1.6298	0.001	6.3155	0.009	-0.3497	0.009	-0.2798	0.029	-40.3588	2.549	-3.48023	-7.18207	23.5059	96.0692	0.659163	37.5836	0.571163	34.8099	33.0008
NS3.2	3921	-2.564	0.001	0.9405	0.003	6.4698	0.003	-0.320142	0.0109106	-0.0602	0.046	-10.1673	3.812	-2.31935	-7.76288	22.9072	43.9892	0.680532	29.8104	0.592532	27.6712	25.4484
NS3.3	3975	-2.5922	0.001	0.9924	0.002	6.707	0.009	-0.37752	0.00615682	-0.1884	0.031	-30.8797	2.06	-2.35084	-7.74826	22.9222	66.4261	0.63684	46.3785	0.54884	42.8382	41.5362
NS4.1	3981	-2.5094	0	1.2373	0.001	7.0896	0.008	-0.341518	0.0083675	-0.1615	0.03	-15.7215	1.958	-2.27165	-7.48925	23.1893	91.3087	0.634424	47.3762	0.546424	43.7455	42.5037
NS4.2	4009	-2.534	0	1.3443	0.001	6.8755	0.001	-0.360707	0.0066387	-0.2213	0.026	-22.4304	1.735	-2.28934	-7.36259	23.3198	93.5052	0.6343	47.4275	0.5463	43.7922	42.5535
NS4.3	3956	-2.5225	0.001	1.2107	0.001	6.7413	0.001	-0.357995	0.00613769	-0.2371	0.026	-27.4739	1.819	-2.27784	-7.49503	23.1833	80.2446	0.643507	43.6739	0.555507	40.3749	38.9125
NS6.1	3900	-3.1147	0.001	1.1556	0.001	6.3774	0.008	-0.371299	0.00702256	-0.2013	0.032	-27.3627	1.46	-2.87347	-7.58648	23.089	90.7714	0.64702	42.2764	0.55902	39.1002	37.5564
NS5.1	3833	-2.4809	0.001	0.5976	0.001	6.1255	0.001	-0.360266	0.00793791	-0.1924	0.03	-20.5999	2.049	-2.23623	-8.1028	22.5567	80.1781	0.635807	46.8039	0.547807	43.2251	41.9487
NS7.1	4200	-0.2494	0.001	3.0315	0.001	11.1314	0.008	-0.3448	0.007	-0.3106	0.032	-49.2466	2.433	-0.0222457	-5.79271	24.9382	87.9422	0.664478	35.5945	0.576478	32.987	31.069
NS8.1	4105	-2.2747	0.001	1.7721	0.001	7.8674	0.008	-0.337262	0.00709716	-0.2609	0.033	-29.9658	1.793	-2.03406	-6.96402	23.7307	81.1847	0.657131	38.3544	0.569131	35.5157	33.7493
NS8.2	3818	-2.1767	0.001	1.4465	0.001	7.6527	0.007	-0.317612	0.00635372	-0.1841	0.025	-7.5534	1.626	-1.93688	-7.28042	23.4045	85.708	0.657468	38.226	0.569468	35.3982	33.6247
NS9.1	4000	-2.7762	0	1.196	0.001	6.7823	0.007	-0.3465	0.007	-0.2891	0.034	-45.7958	3.521	-2.54962	-7.61206	23.0627	106.601	0.662634	36.2802	0.574634	33.6158	31.7351
NS9.2	4189	-2.3948	0.001	1.0615	0.001	7.0339	0.007	-0.326088	0.00620715	-0.2018	0.029	-26.45	2.317	-2.15419	-7.66842	23.0045	95.0092	0.669683	33.683	0.581683	31.2328	29.212
NS9.3	3832	-0.7106	0.001	2.325	0.001	10.0186	0.008	-0.276339	0.00655476	-0.1681	0.029	-8.6569	2.003	-0.470431	-6.40957	24.3023	70.9774	0.704234	21.8359	0.616234	20.306	17.6921
NS9.4	4036	-0.806	0.001	2.3295	0.001	7.8688	0.001	-0.340308	0.00566379	-0.1407	0.028	-24.5082	1.726	-0.560915	-6.38596	24.3266	80.0114	0.666721	34.7666	0.578721	32.2275	30.2648
NN1.1	4185	-4.2029	0.001	1.1894	0.001	5.4153	0.008	-0.31338	0.0064765	-0.1656	0.028	-16.5738	2.196	-3.96556	-7.53673	23.1403	76.5007	0.661549	36.6858	0.573549	33.9874	32.1289	Carbonate Nodules
NN1.2	3848	-4.2064	0.001	1.178	0.002	5.3711	0.012	-0.321992	0.00842377	-0.2169	0.036	-26.8741	3.77	-3.96983	-7.5293	23.148	76.2921	0.66243	36.3564	0.57443	33.6856	31.809
NN1.3	3880	-4.1924	0.001	1.1551	0.001	5.4128	0.007	-0.293306	0.00660219	-0.1732	0.032	-18.1325	1.853	-3.95307	-7.56928	23.1068	90.2095	0.670606	33.348	0.582606	30.925	28.8865
NN1.4	4037	-4.4864	0.001	1.2026	0.001	5.0853	0.023	-0.355057	0.00860994	-0.3409	0.051	-45.0676	5.197	-4.24629	-7.52855	23.1487	99.1498	0.637141	46.2551	0.549141	42.7259	41.4165
NN1.5	4129	-4.4928	0.001	1.2426	0.001	5.2144	0.009	-0.285895	0.00820386	-0.1444	0.024	-13.2899	2.098	-4.25354	-7.48254	23.1962	69.6518	0.680256	29.9073	0.592256	27.7604	25.5426
NN1.6	4065	-4.4976	0	1.1122	0.001	5.0733	0.008	-0.291914	0.00796427	-0.2255	0.036	-4.8542	1.826	-4.25834	-7.61181	23.0629	92.3845	0.675221	31.6878	0.587221	29.399	27.2732
NN1.7	4200	-4.4932	0.001	1.1525	0.001	5.0403	0.021	-0.333084	0.00741818	-0.2864	0.04	-32.5408	6.306	-4.25593	-7.57331	23.1026	89.238	0.640394	44.9283	0.552394	41.5179	40.1295
NN1.8	3969	-4.516	0	1.1175	0.001	5.0428	0.006	-0.309334	0.00641476	-0.1815	0.032	-14.0141	2.121	-4.27873	-7.60801	23.0668	73.765	0.66632	34.9139	0.57832	32.3627	30.4079
NN2.1	4135	-1.3911	0.001	2.1302	0.001	9.0952	0.012	-0.327805	0.00802313	-0.1371	0.044	-1.047	2.749	-1.15109	-6.60268	24.1032	58.2143	0.636862	46.3698	0.548862	42.8302	41.5277
NN2.2	3891	-1.3768	0.001	2.1803	0.002	9.1557	0.012	-0.327109	0.00830997	-0.1306	0.031	1.2182	3.38	-1.13679	-6.55301	24.1544	58.4993	0.638876	45.5454	0.550876	42.0799	40.7281
NN2.3	3924	-1.3617	0.001	2.1761	0.001	9.1515	0.011	-0.345025	0.00748043	-0.1918	0.028	-13.5769	2.434	-1.12368	-6.55863	24.1486	59.0093	0.628563	49.8348	0.540563	45.9787	44.8875
NN2.4	4083	-1.3722	0.001	2.1911	0.002	9.1455	0.01	-0.365657	0.00799525	-0.2188	0.036	-17.4907	2.332	-1.13054	-6.56003	24.1472	56.3438	0.651542	40.504	0.563542	37.4815	35.8362
NN3.1	3885	-4.5831	0.001	1.8295	0.001	5.6718	0.007	-0.342603	0.00671834	-0.2415	0.034	-27.2308	1.938	-4.34662	-6.88346	23.8138	88.1205	0.653987	39.5581	0.565987	36.6169	34.918
NN3.2	4105	-4.6042	0.001	2.0675	0.002	5.8715	0.01	-0.356214	0.00834548	-0.2473	0.049	-37.9738	3.064	-4.36772	-6.64753	24.057	56.6946	0.633742	47.6593	0.545742	44.0029	42.7782
NN3.3	4200	-5.0993	0.001	1.7068	0.001	5.0285	0.01	-0.344032	0.0078762	-0.3483	0.036	-43.7664	5.826	-4.86294	-7.0051	23.6884	87.6909	0.642377	44.1277	0.554377	40.7885	39.3527
NN3.4	4025	-4.6041	0.001	1.7507	0.001	5.6283	0.008	-0.272311	0.00643427	-0.1293	0.028	-5.5269	1.941	-4.36487	-6.97887	23.7154	80.0078	0.70375	21.9926	0.61575	20.4511	17.8445
NN3.5	3953	-4.6045	0	1.9252	0.001	5.7989	0.015	-0.275742	0.00888015	-0.1756	0.036	-9.2576	3.992	-4.36527	-6.80589	23.8937	73.0855	0.701539	22.7112	0.613539	21.1164	18.5438
NN3.6	4107	-5.0393	0	1.8336	0.001	5.2768	0.007	-0.301133	0.00603766	-0.1519	0.025	-8.8926	1.96	-4.80017	-6.89669	23.8001	80.8413	0.673875	32.1694	0.585875	29.8419	27.7413
NN3.7	4041	-4.7422	0.001	1.7958	0.002	5.5146	0.01	-0.287268	0.00658704	-0.143	0.03	-24.0643	2.227	-4.50499	-6.93562	23.76	66.1479	0.690447	26.3967	0.602447	24.5234	22.1291
NN3.8	4122	-5.1506	0.001	1.622	0.001	4.9364	0.007	-0.309964	0.00631223	-0.1891	0.034	-15.8227	2.296	-4.91348	-7.1079	23.5824	73.536	0.666751	34.7554	0.578751	32.2172	30.2539

## Sheet: Meteoric_Water_Composition_SMOW
Sample	δ18O_Calcite VPDB	Temperature (Anderson et al, 2021)	d18O_Water_SMOW	d18O_Water_SMOW [Epstein et al. 1953]	Temperature (K)	d18O_Water_VPDB [Kim and O'Neil 1997]	d18O_Water_VSMOW [Kim and O'Neil 1997]	Comments
NS1.1	-6.84085	36.5191	-41.88	-2.51	309.669	-32.6443	-2.74333	Stromatolites
NS1.2	-7.10635	39.5327	-42.69	-2.24	312.683	-32.3486	-2.43854
NS2.1	-6.95836	31.0816	-40.88	-3.75	304.232	-33.8024	-3.93724
NS2.2	-7.02771	34.0386	-41.52	-3.25	307.189	-33.3013	-3.42064
NS2.3	-7.05982	38.7013	-42.46	-2.37	311.851	-32.4558	-2.54905
NS3.1	-7.18207	33.0008	-41.48	-3.58	306.151	-33.6546	-3.78488
NS3.2	-7.74826	41.5362	-43.68	-2.53	314.686	-32.6234	-2.72182
NS4.1	-7.48925	42.5037	-43.59	-2.09	315.654	-32.1888	-2.27377
NS6.1	-7.58648	37.5564	-42.81	-3.08	310.706	-33.1955	-3.31161
NS7.1	-5.79271	31.069	-39.71	-2.57	304.219	-32.6392	-2.73811
NS8.1	-6.96402	33.7493	-41.45	-3.18	306.899	-33.2929	-3.41201
NS8.2	-7.28042	33.6247	-41.77	-3.5	306.775	-33.6332	-3.7628
NS9.1	-6.40957	17.6921	-37.64	-5.89	290.842	-35.982	-6.18418
NS9.2	-7.66842	29.212	-41.2	-4.85	302.362	-34.8789	-5.04703
NS9.3	-7.61206	31.7351	-41.73	-4.21	304.885	-34.3291	-4.48021
NN1.1	-7.5293	31.809	-41.64	-4.12	304.959	-34.232	-4.3801	Carbonate Nodules
NN1.2	-7.52855	41.4165	-43.28	-2.48	314.567	-32.4255	-2.5178
NN1.3	-7.56928	28.8865	-41.11	-4.75	302.037	-34.844	-5.01108
NN1.4	-7.48254	25.5426	-40.42	-5.26	298.693	-35.4256	-5.61061
NN1.5	-7.61181	27.2732	-40.75	-5.2	300.423	-35.2071	-5.38539
NN1.6	-7.53673	32.1289	-41.65	-4.14	305.279	-34.1775	-4.32391
NN1.7	-7.57331	40.1295	-43.15	-2.7	313.279	-32.7058	-2.8067
NN1.8	-7.60801	30.4079	-41.34	-4.59	303.558	-34.5836	-4.74257
NN2.1	-6.60268	41.5277	-42.53	-1.38	314.678	-31.4794	-1.54242
NN2.2	-6.55301	40.7281	-42.31	-1.51	313.878	-31.5757	-1.6417
NN2.3	-6.55863	44.8875	-43	-0.8	318.037	-30.8301	-0.873021
NN2.4	-6.56003	35.8362	-41.42	-2.41	308.986	-32.4921	-2.58648
NN3.1	-6.88346	34.918	-41.55	-2.91	308.068	-32.9895	-3.09921
NN3.2	-6.64753	42.7782	-42.75	-1.26	315.928	-31.2975	-1.35486
NN3.3	-7.0051	39.3527	-42.41	-2.32	312.503	-32.2806	-2.36838
NN3.4	-6.97887	17.8445	-38.21	-6.46	290.995	-36.5188	-6.73759
NN3.5	-6.80589	18.5438	-38.26	-6.07	291.694	-36.1973	-6.40613
NN3.6	-6.89669	27.7413	-40.23	-4.3	300.891	-34.3987	-4.55193
NN3.7	-6.93562	22.1291	-39.04	-5.55	295.279	-35.5765	-5.76616
NN3.8	-7.1079	30.2539	-40.84	-4.09	303.404	-34.1136	-4.2581
