# Supplementary material for: Middle Eocene Climatic Optimum (MECO) and its imprint in the continental Escanilla Formation, Spain
Source: Copernicus journal article supplement (doi:10.5194/egusphere-2023-894), 2023-05-24
Supplement: Supplementary file 2 [file Geochemical_Calculations.xlsx]

## Sheet: Weathering_Indices
Sample	Height [meters]	CIA [%]
S1	0.63	12.0434
S2	2.5	9.96781
S3	5	16.5144
S4	15	15.4459
S5	20.8	17.6799
S6	30	17.4818
S7	31.25	15.6518
S8	35	13.441
S9	37.5	10.3141
S10	38.75	17.067
S11	40	21.2941
S12	41.3	16.4523
S13	50.6	20.256
S14	51.5	14.3802
S15	52.75	22.4855
S16	54	22.2238
S17	55.25	43.4449
S18	60	12.9364
S19	62.5	12.5394
S20	65	13.6429
S21	74	14.5625
S22	77.1	17.3338
S23	83.35	15.4037
S24	84.6	17.4519
S25	85.85	32.9369
S26	86.5	31.552
S27	94.8	20.7884
S28	96.5	18.6796
S29	102	36.041
S30	107	18.0153
S31	107.6	16.3033
S32	108.22	18.0472
S33	108.5	18.6677
S34	108.7	20.8442
S35	109	20.4679
S36	110.25	27.7827
S37	111.25	14.161
S38	115	17.4611
S39	116.25	19.1062
S40	117.5	19.8338
S41	118.4	23.7466
S42	119.65	32.1122
S43	120.9	19.4907
S44	121	16.6356
S45	121.5	22.678

## Sheet: MAP
Sample	Height [meters]	CIW [%]	MAP [mm yr-1]
S1	0.63	12.3532	281.891
S2	2.5	10.1639	269.992
S3	5	17.0947	309.491
S4	15	15.9467	302.57
S5	20.8	18.3538	317.26
S6	30	18.2289	316.48
S7	31.25	16.2619	304.45
S8	35	13.8297	290.21
S9	37.5	10.5671	272.145
S10	38.75	17.7068	313.245
S11	40	22.3771	343.433
S12	41.3	17.0193	309.03
S13	50.6	21.1911	335.502
S14	51.5	14.8621	296.174
S15	52.75	23.657	352.2
S16	54	23.4334	350.65
S17	55.25	48.1156	570.23
S18	60	13.2853	287.12
S19	62.5	12.8975	284.93
S20	65	14.1096	291.82
S21	74	15.0137	297.06
S22	77.1	17.9952	315.05
S23	83.35	15.9747	302.74
S24	84.6	18.1318	315.879
S25	85.85	35.4304	444.141
S26	86.5	33.8492	430.519
S27	94.8	21.7894	339.48
S28	96.5	19.4668	324.297
S29	102	39.089	477.334
S30	107	18.7279	319.61
S31	107.6	16.9014	308.315
S32	108.22	18.7834	319.96
S33	108.5	19.4243	324.025
S34	108.7	21.7823	339.432
S35	109	21.3922	336.834
S36	110.25	29.5334	395.429
S37	111.25	14.6069	294.688
S38	115	18.1072	315.726
S39	116.25	19.9561	327.438
S40	117.5	20.7236	332.426
S41	118.4	24.9157	361.045
S42	119.65	34.2531	433.958
S43	120.9	20.2759	329.507
S44	121	17.2285	310.308
S45	121.5	23.8362	353.448

## Sheet: Bulk_Rock_Mineralogy
Sample	Height [meters]	Phyllosilicate [%]	Quartz [%]	Calcite [%]	Dolomite [%]
S1	0.63	26.43	13.2753	40.5477	12.4458
S2	2.5	52.65	41.56	0	0
S3	5	49.45	37.34	0	8.42906
S4	15	22.73	18.48	45.74	7.11
S5	20.8	14.67	13.67	39.67	9.56
S6	30	21.56	10.26	29.56	4.04
S7	31.25	20.13	18.1	31.07	11.05
S8	35	28.504	17.7918	39.3	8.32078
S9	37.5	49.7313	32.2513	0	0
S10	38.75	29.56	23.1	42.3211	0
S11	40	53.56	30.03	0	11.4991
S12	41.3	31.7412	19.1554	44.34	0
S13	50.6	53.23	28.3897	0	14.8457
S14	51.5	21.1635	25.885	30.23	10.322
S15	52.75	15.68	12.79	40.67	28.3417
S16	54	16.17	19.09	37.5629	24.6478
S17	55.25	30.56	7.23	55.67	3.59
S18	60	25.49	16.52	44.8891	8.74246
S19	62.5	23.56	8.65	46.2156	19.4219
S20	65	24.34	21.56	40.67	12.44
S21	74	32.06	18.34	36.4483	10.2291
S22	77.1	31.1784	13.9031	41.89	9.66156
S23	83.35	37.4269	31.67	0	25.7452
S24	84.6	62.8311	16.98	0	13.8309
S25	85.85	45.76	23.1	23.01	0
S26	86.5	45.34	33.892	0	14.23
S27	94.8	32.37	18.23	40.19	0
S28	96.5	42.09	45.03	0	0
S29	102	45.87	33.88	0	10.83
S30	107	44.98	37.3984	0	9.54554
S31	107.6	38.8413	35.4225	0	17.4094
S32	108.22	34.76	31.6293	0	28.2144
S33	108.5	27.09	20.06	42.12	6.48754
S34	108.7	54.23	29.02	0	11.0927
S35	109	25.89	26.21	32.12	11.1358
S36	110.25	64.12	27.87	0	0
S37	111.25	50.23	29.76	0	16.21
S38	115	47.12	45.23	0	0
S39	116.25	28.34	25.73	43.02	0
S40	117.5	48.33	32.74	0	11.64
S41	118.4	56.478	26.89	0	10.45
S42	119.65	45.29	41.09	0	0
S43	120.9	54.23	27.29	0	16.21
S44	121	49.34	38.34	0	7.11603
S45	121.5	50.23	36.0793	0	7.23

## Sheet: Clay_Mineralogy
Sample	Height [meters]	Smectite [%]	Palygorskite [%]	Mica [%]	Chlorite [%]	SM_PALY [%/%]
S1	0.63	0	14.77	42.65	42.59	0
S2	2.5	22.3568	10.9031	29.4053	24.8899	2.05051
S3	5	8.04702	24.5931	21.5532	6.92781	0.327206
S4	15	57.8425	2.97582	10.6324	26.7548	19.4375
S5	20.8	29.0835	6.39511	33.6864	22.3887	4.54777
S6	30	23.2496	9.62052	23.4634	37.6435	2.41667
S7	31.25	30.28	4.55	32.19	24.13	6.65495
S8	35	27.62	8.97459	31.2629	32.1411	3.07758
S9	37.5	15.1012	11.8136	47.1942	25.8911	1.27829
S10	38.75	34.2385	2.15365	32.8056	30.8022	15.8979
S11	40	32.4804	9.74411	30.0304	27.745	3.33334
S12	41.3	45.1725	7.21876	22.6131	24.9956	6.25765
S13	50.6	5.29265	7.69418	45.6689	41.3442	0.687877
S14	51.5	6.64228	21.4478	38.0889	33.8209	0.309695
S15	52.75	12.8428	9.83278	38.3278	32.9389	1.30612
S16	54	11.98	7.3	41.06	34.11	1.6411
S17	55.25	18.45	4.5	26.19	48.95	4.1
S18	60	29.8716	3.03384	25.5543	36.0232	9.84615
S19	62.5	55.587	0	24.4539	19.9591	NaN
S20	65	28.2973	7.08948	24.8435	39.7697	3.99145
S21	74	35.6103	7.39693	24.7979	30.4307	4.81421
S22	77.1	0	16.8241	38.2814	44.8945	0
S23	83.35	8.95896	19.5195	41.9085	29.613	0.458974
S24	84.6	0	4.89307	31.5402	63.5668	0
S25	85.85	15.4046	11.1991	43.1528	30.2435	1.37553
S26	86.5	7.15385	15.398	41.0224	36.4257	0.464596
S27	94.8	19.4451	3.91047	38.2043	38.4402	4.97257
S28	96.5	38.3146	1.43007	32.1438	28.1116	26.7922
S29	102	0	10.9113	44.6622	44.4265	0
S30	107	11.3963	16.6377	37.2989	34.6671	0.684973
S31	107.6	6.20665	14.507	40.4964	38.7899	0.427838
S32	108.22	0	12.2543	45.2859	42.4597	0
S33	108.5	0	13.2973	43.0346	43.6681	0
S34	108.7	10.0346	14.5566	42.937	32.4718	0.689353
S35	109	0	4.02848	48.0773	47.8942	0
S36	110.25	0	7.37923	46.0251	46.5957	0
S37	111.25	39.256	4.25155	31.5146	24.9778	9.23335
S38	115	0	14.0745	41.3286	44.5969	0
S39	116.25	0	2.38655	52.9265	44.687	0
S40	117.5	0	3.16969	49.7681	47.0622	0
S41	118.4	6.76039	9.18204	42.3074	41.7502	0.736262
S42	119.65	31.7001	13.8242	23.8794	30.5964	2.2931
S43	120.9	28.1428	13.5715	28.9461	29.3395	2.07367
S44	121	7.17003	21.1286	38.0841	33.6173	0.339353
S45	121.5	26.3255	2.40203	34.9386	36.3339	10.9597
