# Supplementary material for: Middle Eocene Climatic Optimum (MECO) and its imprint in the continental Escanilla Formation, Spain
Source: Copernicus journal article supplement (doi:10.5194/egusphere-2023-894), 2023-05-24
Supplement: Supplementary file 3 [file Sampling_Stations_v2.xlsx]

## Sheet: paleosols
Sample	Height [meters]	Latitude	Longitude
S1	0.63	42°16'37.50"N	0° 7'22.52"E
S2	2.5	42°16'37.40"N	0° 7'24.20"E
S3	5	42°16'37.30"N	0° 7'24.40"E
S4	15	42°16'18.37"N	0° 7'38.38"E
S5	20.8	42°16'18.14"N	0° 7'38.22"E
S6	30	42°16'17.90"N	0° 7'38.53"E
S7	31.25	42°16'17.81"N	0° 7'38.47"E
S8	35	42°16'17.00"N	0° 7'38.00"E
S9	37.5	42°16'15.30"N	0° 6'57.10"E
S10	38.75	42°16'13.82"N	0° 6'56.90"E
S11	40	42°16'14.20"N	0° 6'57.16"E
S12	41.3	42°16'22.70"N	0° 7'45.10"E
S13	50.6	42°16'16.50"N	0° 6'58.00"E
S14	51.5	42°16'16.50"N	0° 6'58.30"E
S15	52.75	42°16'16.32"N	0° 7'37.22"E
S16	54	42°16'16.27"N	0° 7'37.23"E
S17	55.25	42°16'16.18"N	0° 7'37.25"E
S18	60	42°16'16.12"N	0° 7'37.14"E
S19	62.5	42°16'15.34"N	0° 7'37.91"E
S20	65	42°16'15.89"N	0° 7'34.22"E
S21	74	42°16'15.11"N	0° 7'37.97"E
S22	77.1	42°16'11.63"N	0° 6'56.84"E
S23	83.35	42°16'11.90"N	0° 7'28.70"E
S24	84.6	42°16'13.17"N	0° 6'57.37"E
S25	85.85	42°16'10.60"N	0° 7'30.00"E
S26	86.5	42°16'10.60"N	0° 7'30.00"E
S27	94.8	42°16'10.60"N	0° 7'30.00"E
S28	96.5	42°16'5.51"N	0° 7'27.07"E
S29	102	42°16'5.50"N	0° 7'27.30"E
S30	107	42°16'4.70"N	0° 7'27.50"E
S31	107.6	42°16'4.40"N	0° 7'27.70"E
S32	108.22	42°16'4.40"N	0° 7'27.70"E
S33	108.5	42°16'4.40"N	0° 7'27.70"E
S34	108.7	42°16'4.40"N	0° 7'27.70"E
S35	109	42°16'4.40"N	0° 7'27.70"E
S36	110.25	42°16'4.40"N	0° 7'27.70"E
S37	111.25	42°16'4.40"N	0° 7'27.70"E
S38	115	42°16'4.10"N	0° 7'27.70"E
S39	116.25	42°16'3.10"N	0° 7'29.80"E
S40	117.5	42°16'3.30"N	0° 7'30.00"E
S41	118.4	42°16'2.50"N	0° 7'30.40"E
S42	119.65	42°16'2.50"N	0° 7'30.40"E
S43	120.9	42°16'2.50"N	0° 7'30.40"E
S44	121	42°16'2.30"N	0° 7'30.60"E
S45	121.5	42°16'2.20"N	0° 7'31.10"E

## Sheet: stromatolites
Sample	Height [meters]	Latitude	Longitude
NS1	13	42°16'59.4"N	00°08'57.9"E
NS2	30	42°16'29.5"N	00°07'23.7"E
NS3	31.25	42°16'32.6"N	00°07'27.2"E
NS4	77.2	42°16'15.6"N	00°07'00.7"E
NS5	84.6	42°16'14.61"N	00°06'59.83"E
NS6	86.5	42°16'14.25"N	00°07'1.24"E
NS7	96.5	42°16'13.7"N	00°07'12.2"E
NS8	101.3	42°16'11.4"N	00°07'11.9"E
NS9	117.5	42°16'00.4"N	00°07'04.5"E

## Sheet: carbonate nodules
Sample	Height [meters]	Latitude	Longitude
NN1	52	42°16'20.1"N	00°07'45.2"E
NN2	65	42°16'12.1"N	00°07'29.9"E
NN3	115	42°16'05.6"N	00°07'39.5"E
