# Supplementary material for: Middle Eocene Climatic Optimum (MECO) and its imprint in the continental Escanilla Formation, Spain
Source: Copernicus journal article supplement (doi:10.5194/egusphere-2023-894), 2023-05-24
Supplement: Supplementary file 6 [file XRF_Major_Element_Data.xlsx]

## Sheet: Sheet1
Sample	Height [meters]	SiO2	Anhyd	moles	TiO2	Anhyd	moles	Al2O3	Anhyd	moles	Fe2O3 (T)	Anhyd	moles	FeO (T)	Anhyd	moles	MnO	Anhyd	moles	MgO	Anhyd	moles	Mg	CaO	Anhyd	moles	Ca	Na2O	Anhyd	moles	Na	K2O	Anhyd	moles	K	P2O5	Anhyd	moles	Cr2O3	NiO	LOI	Somme (+LOI)		Total (-LOI)	CaO* (moles)
		%	wt-%		%	wt-%		%	wt-%		%	wt-%		%	wt-%		%			%	wt-%			%	wt-%			%	wt-%			%	wt-%			%	wt-%		%	%	%	%		%
S1	0.63	28.61	39.5205	0.657754	0.415038	0.573313	0.00717853	7.2668	10.038	0.0984505	3.09458	4.2747	0.0267688	2.7845	3.84638	0.0535379	0.0655323	0.0905232	0.00127611	2.97808	4.11377	0.102069	2.48102	28.3536	39.1664	0.698439	27.996	0.109221	0.150872	0.00243424	0.111923	1.39802	1.93116	0.0205017	1.60316	0.0728137	0.100581	0.000708603	0.00728137	0.0218441	27.0286	99.412		72.3929	0.696077
S2	2.5	25.18	36.0284	0.599634	0.360502	0.515818	0.00645863	6.32646	9.05211	0.088781	2.58006	3.69164	0.0231176	2.32154	3.32174	0.0462354	0.0565493	0.0809127	0.00114063	3.32227	4.75362	0.117944	2.86691	30.7487	43.9963	0.784569	31.4484	0.0989613	0.141597	0.0022846	0.105042	1.13099	1.61825	0.0171798	1.3434	0.063618	0.0910268	0.000641291	0.00706867	0.0141373	28.9821	98.877		69.8893	0.782431
S3	5	31.75	42.1574	0.701641	0.451664	0.599716	0.00750912	9.23653	12.2642	0.120284	3.70365	4.91767	0.0307951	3.33254	4.42492	0.0615907	0.0602219	0.0799621	0.00112723	3.48534	4.62781	0.114823	2.79103	24.6232	32.6945	0.583029	23.3699	0.135499	0.179915	0.00290283	0.133468	1.75396	2.3289	0.0247242	1.93334	0.0828051	0.109948	0.000774592	0.00752774	0.0225832	24.735	100.037		75.313	0.580447
S4	15	27.579	37.4852	0.62388	0.54	0.733965	0.00919007	8.998	12.23	0.119949	3.866	5.25465	0.0329053	3.47863	4.72813	0.0658147	0.053	0.0720373	0.00101551	4.58	6.22511	0.154454	3.75436	26.055	35.4138	0.631521	25.3137	0.139	0.188928	0.00304826	0.140154	1.69	2.29704	0.024386	1.90689	0.073	0.0992212	0.000699021	NaN	NaN	24.86	98.433		73.573	0.629191
S5	20.8	29.804	39.6151	0.659328	0.555	0.737698	0.00923682	9.809	13.038	0.127874	4.161	5.53074	0.0346343	3.74407	4.97656	0.0692729	0.052	0.0691177	0.000974353	4.764	6.33224	0.157112	3.81898	24.004	31.9058	0.568964	22.8061	0.118	0.156844	0.0025306	0.116353	1.882	2.50153	0.0265569	2.07665	0.085	0.112981	0.000795959	NaN	NaN	24.63	99.864		75.234	0.566311
S6	30	26.145	35.3449	0.588259	0.482	0.651607	0.00815885	10.37	14.019	0.137495	4.243	5.73603	0.0359198	3.81785	5.16128	0.0718441	0.05	0.0675941	0.000952874	4.642	6.27543	0.155702	3.78471	25.585	34.5879	0.616793	24.7233	0.123	0.166281	0.00268287	0.123354	2.246	3.03633	0.0322345	2.52061	0.085	0.11491	0.00080955	NaN	NaN	25.76	99.731		73.971	0.614094
S7	31.25	27.439	37.0122	0.616008	0.5	0.674445	0.00844482	9.339	12.5973	0.123551	3.867	5.21616	0.0326643	3.47953	4.6935	0.0653327	0.048	0.0647467	0.000912736	4.235	5.71255	0.141737	3.44524	26.463	35.6957	0.636548	25.5151	0.098	0.132191	0.00213284	0.0980647	2.068	2.78951	0.0296142	2.31571	0.078	0.105213	0.000741237	NaN	NaN	25.72	99.855		74.135	0.634077
S8	35	29.32	38.5333	0.641324	0.43	0.56512	0.00707594	8.23	10.8161	0.106082	3.49	4.58667	0.0287224	3.1403	4.12709	0.0574483	0.07	0.0919963	0.00129687	4.53	5.95348	0.147714	3.59054	28.2	37.0614	0.660902	26.4913	0.12	0.157708	0.00254454	0.116994	1.59	2.08963	0.0221841	1.73471	0.08	0.105139	0.00074071	0.01	0.02	23.43	99.5		76.09	0.658432
S9	37.5	22.9493	32.7872	0.54569	0.356616	0.509491	0.0063794	6.6848	9.55045	0.0936686	2.56624	3.66633	0.0229591	2.3091	3.29897	0.0459185	0.118872	0.16983	0.0023941	4.53811	6.48352	0.160865	3.91021	31.1445	44.4955	0.793472	31.8052	0.0909021	0.12987	0.00209539	0.0963428	1.43346	2.04795	0.0217416	1.70011	0.0839096	0.11988	0.000844565	0.00699247	0.0209774	30.1054	100.088		69.9946	0.790656
S10	38.75	32.4914	42.9877	0.715459	0.478037	0.632467	0.0079192	9.27241	12.2678	0.12032	3.56631	4.7184	0.0295473	3.20897	4.24562	0.059095	0.075879	0.100392	0.00141522	3.89259	5.15009	0.127781	3.10602	23.697	31.3523	0.559093	22.4105	0.159346	0.210822	0.00340151	0.156396	1.81351	2.39936	0.0254722	1.99183	0.106231	0.140548	0.000990173	0.0075879	0.0227637	24.027	99.612		75.583	0.555793
S11	40	34.2032	43.8405	0.729654	0.514451	0.659407	0.00825651	11.0997	14.2272	0.139537	4.05325	5.19532	0.0325338	3.64711	4.67475	0.0650681	0.0701524	0.0899191	0.00126759	4.20914	5.39514	0.133861	3.25381	21.1393	27.0956	0.483186	19.3678	0.233841	0.29973	0.004836	0.222352	2.33062	2.98731	0.0317141	2.47992	0.13251	0.169847	0.00119659	0.00779471	0.0233841	22.0728	100.079		78.0172	0.479197
S12	41.3	34.0586	44.7292	0.744444	0.457367	0.600661	0.00752095	8.84244	11.6128	0.113895	3.60558	4.73521	0.0296525	3.2443	4.26074	0.0593055	0.0686051	0.0900991	0.00127013	3.48362	4.57503	0.113513	2.7592	23.6459	31.0542	0.553777	22.1974	0.205815	0.270297	0.00436111	0.200517	1.65415	2.17239	0.0230627	1.80341	0.0914735	0.120132	0.000846341	0.00762279	0.0228684	23.746	99.879		76.144	0.550956
S13	50.6	31.5012	41.3582	0.68834	0.504264	0.662052	0.00828964	10.9716	14.4047	0.141278	4.07231	5.34657	0.033481	3.66427	4.81085	0.0669624	0.0687632	0.0902799	0.00127268	4.10287	5.3867	0.133652	3.24872	22.4092	29.4212	0.524657	21.0302	0.191009	0.250777	0.00404617	0.186037	2.20806	2.89899	0.0307764	2.4066	0.106965	0.140435	0.000989378	0.00764036	0.0229211	23.5233	99.691		76.1667	0.521359
S14	51.5	34.6107	45.7083	0.760739	0.448503	0.59231	0.00741639	7.88301	10.4106	0.102105	3.28395	4.33691	0.0271583	2.9549	3.90236	0.0543171	0.0608139	0.0803132	0.00113218	2.74423	3.62413	0.08992	2.18572	24.8197	32.7778	0.584515	23.4295	0.12923	0.170666	0.0027536	0.126607	1.64198	2.16846	0.0230209	1.80015	0.0760174	0.100392	0.000707266	0.00760174	0.0152035	23.8891	99.612		75.7209	0.582157
S15	52.75	30.475	39.5538	0.658308	0.578	0.750191	0.00939324	12.239	15.8851	0.155797	5.076	6.58819	0.0412561	4.56738	5.92805	0.0825174	0.052	0.0674913	0.000951426	4.176	5.42007	0.13448	3.26884	21.697	28.1607	0.50218	20.1292	0.168	0.218049	0.00351811	0.161757	2.49	3.23179	0.0343096	2.68288	0.096	0.124599	0.000877812	NaN	NaN	22.8	99.847		77.047	0.499254
S16	54	30.5	39.516	0.657679	0.577	0.747564	0.00936035	12.248	15.8686	0.155635	5.243	6.79286	0.0425378	4.71765	6.11221	0.0850809	0.059	0.0764407	0.00107759	3.648	4.72637	0.117268	2.85047	21.981	28.4787	0.50785	20.3565	0.191	0.247461	0.00399265	0.183576	2.628	3.40485	0.0361468	2.82654	0.109	0.141221	0.000994913	NaN	NaN	22.49	99.674		77.184	0.504534
S17	55.25	42.833	50.3989	0.838807	0.789	0.928366	0.0116242	16.142	18.9933	0.186282	7.328	8.62239	0.0539946	6.59373	7.75843	0.107996	0.034	0.0400056	0.00056396	4.683	5.51019	0.136716	3.3232	9.493	11.1698	0.199187	7.98414	0.246	0.289453	0.00467017	0.214727	3.332	3.92055	0.0416217	3.25465	0.108	0.127077	0.000895266	NaN	NaN	14.81	99.798		84.988	0.196203
S18	60	27.06	36.3597	0.605148	0.602	0.80889	0.0101282	8.222	11.0477	0.108353	4.102	5.51174	0.0345152	3.69098	4.95946	0.0690348	0.042	0.0564342	0.000795553	3.183	4.2769	0.106116	2.5794	29.519	39.6638	0.70731	28.3515	0.088	0.118243	0.00190779	0.0877174	1.542	2.07194	0.0219963	1.72002	0.063	0.0846513	0.000596375	NaN	NaN	25.37	99.793		74.423	0.705322
S19	62.5	24.886	34.0307	0.566386	0.555	0.758943	0.00950283	8.227	11.2501	0.110339	3.866	5.28662	0.0331055	3.47863	4.7569	0.0662152	0.067	0.0916202	0.00129157	3.077	4.20769	0.104399	2.53766	30.576	41.8116	0.745611	29.8868	0.105	0.143584	0.00231665	0.106516	1.683	2.30144	0.0244328	1.91055	0.086	0.117602	0.000828516	NaN	NaN	26.64	99.768		73.128	0.742849
S20	65	24.463	33.6729	0.56043	0.559	0.769453	0.00963442	8.689	11.9602	0.117303	4.326	5.95466	0.0372889	3.89253	5.358	0.0745824	0.059	0.0812124	0.00114485	3.333	4.58781	0.11383	2.76691	29.053	39.9909	0.713143	28.5854	0.148	0.203719	0.00328691	0.151127	1.946	2.67863	0.0284371	2.22367	0.073	0.100483	0.000707912	NaN	NaN	23.88	96.529		72.649	0.710783
S21	74	25.566	34.9076	0.58098	0.551	0.752331	0.00942004	9.149	12.492	0.122518	4.031	5.5039	0.0344661	3.62709	4.95241	0.0689366	0.054	0.0737312	0.00103939	3.478	4.74884	0.117825	2.86402	28.451	38.8468	0.69274	27.7675	0.142	0.193886	0.00312825	0.143832	1.744	2.38124	0.02528	1.97679	0.073	0.0996737	0.000702209	NaN	NaN	25.41	98.649		73.239	0.690399
S22	77.1	29.6944	39.7334	0.661298	0.456837	0.611284	0.00765396	9.82574	13.1476	0.128949	3.81946	5.11073	0.0320041	3.43675	4.59864	0.0640086	0.0674022	0.0901894	0.0012714	4.0666	5.44143	0.13501	3.28172	24.6093	32.9292	0.587213	23.5376	0.149783	0.200421	0.00323369	0.14868	1.92471	2.57541	0.0273412	2.13798	0.0898696	0.120253	0.000847189	0.00748913	0.0224674	25.056	99.783		74.734	0.584389
S23	83.35	33.3631	44.1297	0.734466	0.444942	0.588529	0.00736904	8.19749	10.8429	0.106345	3.22017	4.25935	0.0266726	2.89751	3.83256	0.0533456	0.0603311	0.0798005	0.00112495	4.60025	6.08479	0.150972	3.66974	23.7177	31.3716	0.559437	22.4243	0.128204	0.169576	0.00273602	0.125798	1.75714	2.32419	0.0246742	1.92943	0.0904967	0.119701	0.000843302	0.00754139	0.0150828	24.6475	100.255		75.6025	0.556626
S24	84.6	28.0477	37.9076	0.63091	0.458828	0.620124	0.00776465	9.84259	13.3027	0.130469	3.88523	5.25105	0.0328828	3.49593	4.72489	0.065766	0.066604	0.090018	0.00126899	5.0249	6.79136	0.168503	4.09587	24.4215	33.0066	0.588594	23.593	0.16281	0.220044	0.0035503	0.163237	1.95372	2.64053	0.0280326	2.19204	0.0962058	0.130026	0.000916044	0.00740044	0.0222013	25.9904	99.988		73.9896	0.585541
S25	85.85	39.1803	48.3624	0.804913	0.604883	0.74664	0.00934878	13.6462	16.8442	0.165204	5.30684	6.55052	0.0410202	4.7751	5.89416	0.0820411	0.0564558	0.0696864	0.00098237	5.5488	6.84918	0.169938	4.13074	13.5897	16.7745	0.299134	11.9904	0.250018	0.308611	0.00497929	0.22894	2.69375	3.32504	0.0352995	2.76028	0.104846	0.129418	0.000911758	0.00806511	0.0241953	19.436	100.464		81.014	0.296094
S26	86.5	41.9434	51.2166	0.852417	0.612491	0.747906	0.00936463	12.6581	15.4567	0.151596	5.01426	6.12286	0.0383421	4.51183	5.50935	0.0766848	0.0571658	0.0698045	0.000984036	5.16942	6.31233	0.156618	3.80696	13.5565	16.5536	0.295195	11.8325	0.220497	0.269246	0.00434415	0.199737	2.51529	3.0714	0.0326068	2.54973	0.114332	0.139609	0.000983557	0.00816654	0.0244996	18.3859	100.287		81.8941	0.291916
S27	94.8	33.8087	43.798	0.728947	0.516105	0.668596	0.00837158	10.7535	13.9307	0.13663	4.11343	5.32881	0.0333697	3.70126	4.79486	0.0667399	0.0693275	0.0898114	0.00126607	4.22898	5.4785	0.135929	3.30408	21.2142	27.4823	0.490081	19.6442	0.161764	0.20956	0.00338114	0.15546	2.19537	2.84403	0.030193	2.36097	0.10014	0.129728	0.000913941	0.00770305	0.0231092	23.0177	100.203		77.1923	0.487035
S28	96.5	36.4311	46.8002	0.778914	0.504371	0.647927	0.00811277	9.58305	12.3106	0.12074	3.63147	4.66507	0.0292133	3.2676	4.19763	0.058427	0.0620765	0.0797448	0.00112416	3.63147	4.66507	0.115747	2.8135	21.7966	28.0004	0.499321	20.0146	0.155191	0.199362	0.00321661	0.147895	1.91661	2.46212	0.0261386	2.04393	0.100874	0.129585	0.000912939	0.00775956	0.0232787	22.4761	100.305		77.8439	0.496277
S29	102	44.5735	53.546	0.891186	0.642967	0.772394	0.00967125	13.4105	16.1099	0.158003	5.16044	6.19922	0.0388203	4.64336	5.57806	0.0776412	0.0584515	0.0702177	0.00098986	4.87653	5.85816	0.145349	3.53306	11.4315	13.7326	0.244888	9.81599	0.250507	0.300933	0.0048554	0.223244	2.68042	3.21998	0.0341842	2.67307	0.125253	0.150466	0.00106005	0.00835022	0.0250507	16.4466	99.679		83.2434	0.241354
S30	107	34.8051	45.7016	0.760629	0.482979	0.634186	0.00794072	9.42959	12.3817	0.121437	3.60317	4.73123	0.0296276	3.24214	4.25716	0.0592556	0.0766633	0.100664	0.00141907	3.17386	4.16751	0.103402	2.51342	22.4853	29.5249	0.526506	21.1043	0.14566	0.191262	0.00308592	0.141886	1.83992	2.41595	0.0256483	2.0056	0.0843296	0.110731	0.000780108	0.00766633	0.022999	23.1827	99.334		76.1573	0.523905
S31	107.6	30.5269	43.0579	0.716628	0.453518	0.639681	0.00800953	8.45327	11.9232	0.11694	3.33819	4.70847	0.0294851	3.0037	4.23668	0.0589706	0.0743472	0.104866	0.00147829	3.24897	4.58263	0.113702	2.76379	22.8617	32.2462	0.575035	23.0495	0.12639	0.178272	0.00287633	0.132249	1.69512	2.39094	0.0253829	1.98484	0.0892166	0.125839	0.000886545	0.00743472	0.0223041	24.4626	95.352		70.8974	0.57208
S32	108.22	34.4996	45.002	0.748985	0.476068	0.620994	0.00777554	9.60583	12.53	0.122892	3.57819	4.66747	0.0292283	3.21965	4.19979	0.058457	0.0767852	0.10016	0.00141196	3.37855	4.40705	0.109345	2.65789	22.8359	29.7877	0.531192	21.2921	0.15357	0.200321	0.00323207	0.148606	1.92731	2.51402	0.0266896	2.08702	0.0998207	0.130208	0.000917328	0.00767852	0.0230356	23.1777	99.824		76.6623	0.528134
S33	108.5	33.6629	43.674	0.726883	0.514465	0.667464	0.0083574	10.1972	13.2297	0.129754	3.81626	4.95119	0.031005	3.43387	4.45508	0.0620104	0.0767859	0.0996214	0.00140436	3.30179	4.28372	0.106285	2.58351	23.2431	30.1554	0.53775	21.555	0.168929	0.219167	0.00353615	0.162587	1.96572	2.55031	0.0270748	2.11714	0.0998216	0.129508	0.000912393	0.00767859	0.0230358	23.3023	100.392		77.0777	0.534709
S34	108.7	32.5561	42.1615	0.701709	0.516274	0.668596	0.00837158	11.5044	14.8987	0.146123	4.2766	5.53837	0.034682	3.84809	4.98342	0.0693645	0.0924671	0.119749	0.0016881	3.07453	3.98164	0.0987902	2.40133	22.6853	29.3783	0.523892	20.9995	0.184934	0.239497	0.00386416	0.177668	2.19609	2.84403	0.030193	2.36097	0.100173	0.129728	0.000913941	0.00770559	0.0231168	22.9923	100.211		77.2177	0.520846
S35	109	36.8466	47.0582	0.783207	0.516212	0.659275	0.00825487	10.3868	13.2654	0.130104	3.9107	4.99451	0.0312763	3.51885	4.49406	0.062553	0.078214	0.0998901	0.00140815	3.26152	4.16542	0.10335	2.51216	20.977	26.7905	0.477745	19.1498	0.164249	0.209769	0.00338452	0.155615	2.02574	2.58715	0.0274659	2.14773	0.101678	0.129857	0.000914854	0.0078214	0.0234642	21.81	100.112		78.3	0.474696
S36	110.25	37.0423	46.0369	0.76621	0.55943	0.695272	0.00870559	13.3384	16.5773	0.162586	5.01089	6.22765	0.0389984	4.5088	5.60364	0.0779973	0.0799186	0.0993246	0.00140018	3.97995	4.94636	0.122726	2.98315	17.4702	21.7124	0.387188	15.5199	0.199796	0.248311	0.00400638	0.184207	2.62932	3.26778	0.0346916	2.71275	0.111886	0.139054	0.00097965	0.00799186	0.0319674	20.218	100.686		80.462	0.383923
S37	111.25	29.4949	39.8626	0.663449	0.405049	0.547427	0.00685441	8.35873	11.2969	0.110797	3.071	4.15049	0.0259909	2.76329	3.73461	0.0519823	0.0662807	0.089579	0.0012628	3.80009	5.13586	0.127428	3.09744	26.8952	36.3492	0.648201	25.9822	0.117832	0.159252	0.00256944	0.118139	1.66438	2.24943	0.0238805	1.86736	0.0957387	0.129392	0.000911576	0.00736452	0.014729	26.4787	100.469		73.9913	0.645162
S38	115	32.2892	42.4034	0.705736	0.477628	0.62724	0.00785376	9.87856	12.9729	0.127235	3.84377	5.04779	0.0316099	3.45862	4.542	0.0632203	0.0682326	0.0896057	0.00126317	2.89609	3.80327	0.0943645	2.29375	24.541	32.2282	0.574713	23.0366	0.166791	0.219036	0.00353404	0.16249	1.86502	2.44922	0.0260016	2.03323	0.0909768	0.119474	0.000841706	0.0075814	0.0227442	24.2924	100.43		76.1476	0.571908
S39	116.25	37.8448	47.9845	0.798623	0.5181	0.656913	0.00822529	9.7968	12.4216	0.121828	3.87005	4.90694	0.0307279	3.48227	4.41526	0.0614562	0.07065	0.089579	0.0012628	2.8731	3.64288	0.090385	2.19702	21.5796	27.3614	0.487926	19.5578	0.1727	0.218971	0.00353298	0.162441	2.01745	2.55798	0.0271562	2.12351	0.0942	0.119439	0.000841455	0.00785	0.02355	21.6011	100.467		78.8689	0.485121
S40	117.5	32.9282	42.9572	0.714952	0.490779	0.640256	0.00801673	10.7358	14.0056	0.137364	3.97991	5.19208	0.0325135	3.58112	4.67183	0.0650274	0.0690158	0.090036	0.00126924	3.47379	4.53181	0.112441	2.73314	22.5528	29.4218	0.524667	21.0306	0.161037	0.210084	0.0033896	0.155849	2.14716	2.80112	0.0297375	2.32535	0.0843526	0.110044	0.000775269	0.00766842	0.0230053	23.3065	99.96		76.6535	0.522083
S41	118.4	32.8109	42.3381	0.704649	0.511943	0.660595	0.00827139	12.3642	15.9544	0.156477	4.63851	5.98539	0.0374813	4.17373	5.38565	0.0749631	0.0775671	0.10009	0.00141097	4.08003	5.26474	0.130626	3.17516	20.4467	26.3837	0.470491	18.859	0.186161	0.240216	0.00387577	0.178202	2.2572	2.91262	0.0309212	2.41792	0.0930805	0.120108	0.000846171	0.00775671	0.0232701	22.4128	99.909		77.4972	0.467671
S42	119.65	44.3545	54.1013	0.900428	0.609854	0.743868	0.00931407	12.3289	15.0382	0.147491	4.96948	6.06152	0.037958	4.47154	5.45416	0.0759166	0.0494476	0.0603136	0.000850242	4.17832	5.0965	0.126452	3.0737	12.9965	15.8524	0.28269	11.3313	0.164825	0.201045	0.00324377	0.149143	2.2169	2.70406	0.0287071	2.24478	0.0988952	0.120627	0.000849829	0.00824126	0.00824126	17.4959	99.476		81.9841	0.279858
S43	120.9	33.1057	43.7971	0.728931	0.470769	0.622803	0.00779819	9.96967	13.1894	0.129358	3.81171	5.04269	0.031578	3.42978	4.53741	0.0631565	0.0759305	0.100452	0.00141607	4.52546	5.98694	0.148545	3.61072	21.5187	28.4681	0.507661	20.3489	0.167047	0.220994	0.00356563	0.163942	1.82993	2.42089	0.0257009	2.00971	0.0835236	0.110497	0.000778462	0.00759305	0.0227792	23.9612	99.553		75.5888	0.505066
S44	121	31.9448	42.6307	0.709518	0.473646	0.632086	0.00791443	9.12708	12.1802	0.119461	3.67639	4.90619	0.0307232	3.30802	4.41459	0.0614469	0.0827001	0.110364	0.00155581	3.53355	4.71556	0.117	2.84395	24.1033	32.1661	0.573607	22.9922	0.135327	0.180596	0.00291383	0.133973	1.74422	2.32768	0.0247113	1.93233	0.0827001	0.110364	0.000777525	0.00751819	0.0225546	24.7362	99.685		74.9338	0.571015
S45	121.5	35.9554	46.0472	0.766381	0.486308	0.622803	0.00779819	11.4518	14.666	0.143841	3.95322	5.06278	0.0317038	3.5571	4.55549	0.0634081	0.0627495	0.0803616	0.00113286	3.49828	4.48016	0.111159	2.70198	20.1034	25.7459	0.459116	18.403	0.172561	0.220994	0.00356563	0.163942	2.26682	2.90306	0.0308197	2.40998	0.101968	0.130588	0.000920001	0.00784368	0.023531	21.4662	99.55		78.0838	0.456049
